# Supplementary material for: S100A8-mediated metabolic adaptation controls HIV-1 persistence in macrophages in vivo
Source: PubMed Central journal article supplement (PMC9553955; doi:10.1038/s41467-022-33401-x), 2022-10-11
Supplement: 41467_2022_33401_MOESM2_ESM.pdf [file 41467_2022_33401_MOESM2_ESM.pdf]

**Real et al.**

**S100A8-mediated metabolic adaptation controls HIV-1 persistence in macrophages *in vivo***

**Supplementary Dataset 1:** List of HIV-1 mRNA probe sequences used for FISH-flow.

**Supplementary Dataset 2:** List of antibodies used in this study.
